# Supplementary material
Source: PubMed Central journal article supplement (PMC6410811)
Supplement: pnas.1816268116.sapp.pdf [file pnas.1816268116.sapp.pdf]

# Two E3 Ligases Antagonistically Regulate the UV-B Response in Arabidopsis

Hui Ren,<sup>1</sup> Jiupan Han,<sup>1</sup> Panyu Yang,<sup>2</sup> Weiwei Mao,<sup>1</sup> Xin Liu,<sup>1</sup> Leilei Qiu,<sup>1</sup> Chongzhen Qian,<sup>1</sup>

Yan Liu,<sup>1</sup> Zhiren Chen,<sup>1</sup> Xinhao Ouyang,<sup>1</sup> Xu Chen,<sup>3</sup> Xing Wang Deng,<sup>2</sup> and Xi Huang<sup>1,\*</sup>

## Supporting Information

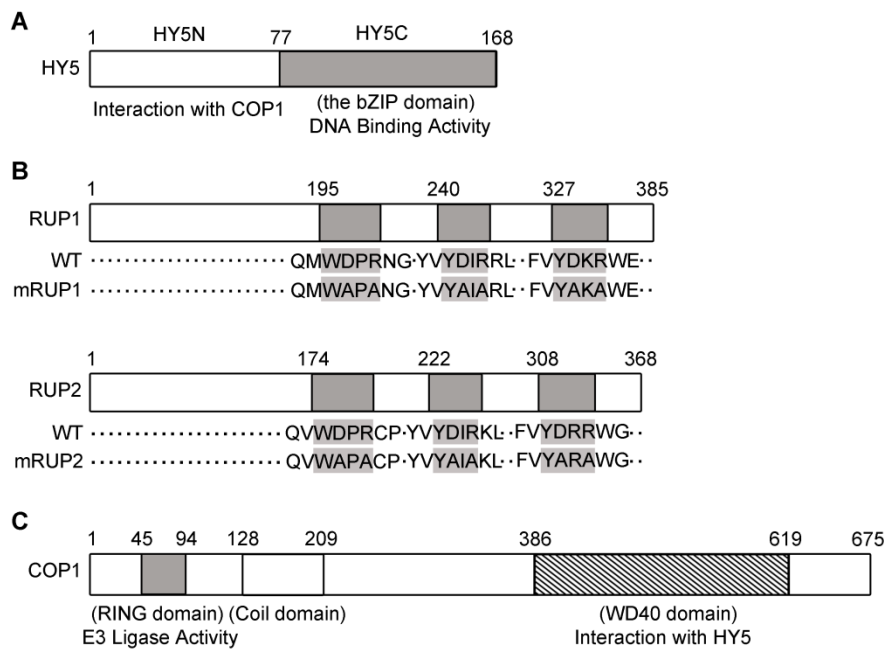

**Fig. S1. Schematic Diagrams of HY5, RUP1, RUP2 and COP1 Proteins.**

(A) Schematic diagram of the functional domains of HY5 protein. HY5N, the N-terminal domain of HY5. HY5C, the C-terminal domain of HY5. Numbers indicate the positions of amino acids.

(B) Schematic diagrams of RUP1 and RUP2 proteins. WT, RUP1/RUP2 with wild-type DWD motifs. mRUP1/mRUP2, RUP1/RUP2 with mutated DWD motifs. Numbers indicate the positions of amino acids.

(C) Schematic diagram of the functional domains of COP1 protein. Numbers indicate the positions of amino acids.

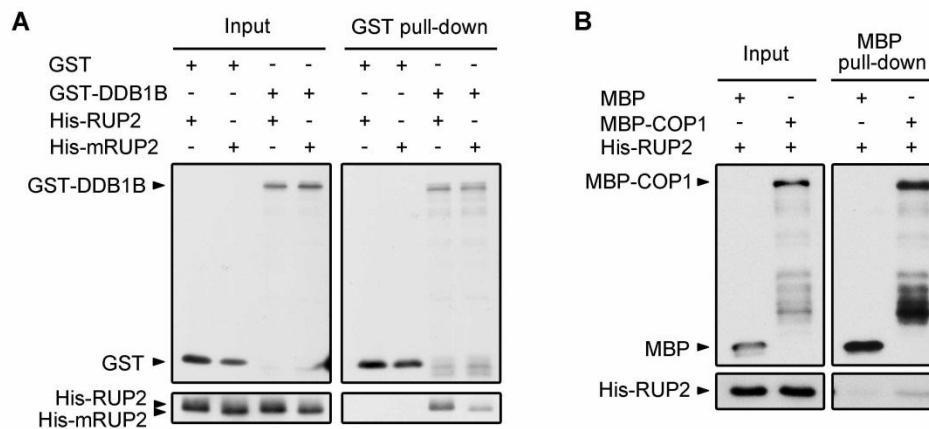

**Fig. S2. In Vitro Pull-down Assays of GST-DDB1B/MBP-COP1 and His-RUP2.**

(A) DDB1B interacts with RUP2 in vitro. The purified GST or GST-DDB1B was incubated with His-RUP2 or His-mRUP2 before being pulled down by Glutathione Sepharose. His-RUP2 and His-mRUP2 were detected by anti-RUP2 antibodies.

(B) COP1 interacts with RUP2 in vitro. The purified MBP or MBP-COP1 was incubated with His-RUP2 before being pulled down by Amylose Resin. His-RUP2 was detected by anti-RUP2 antibodies.

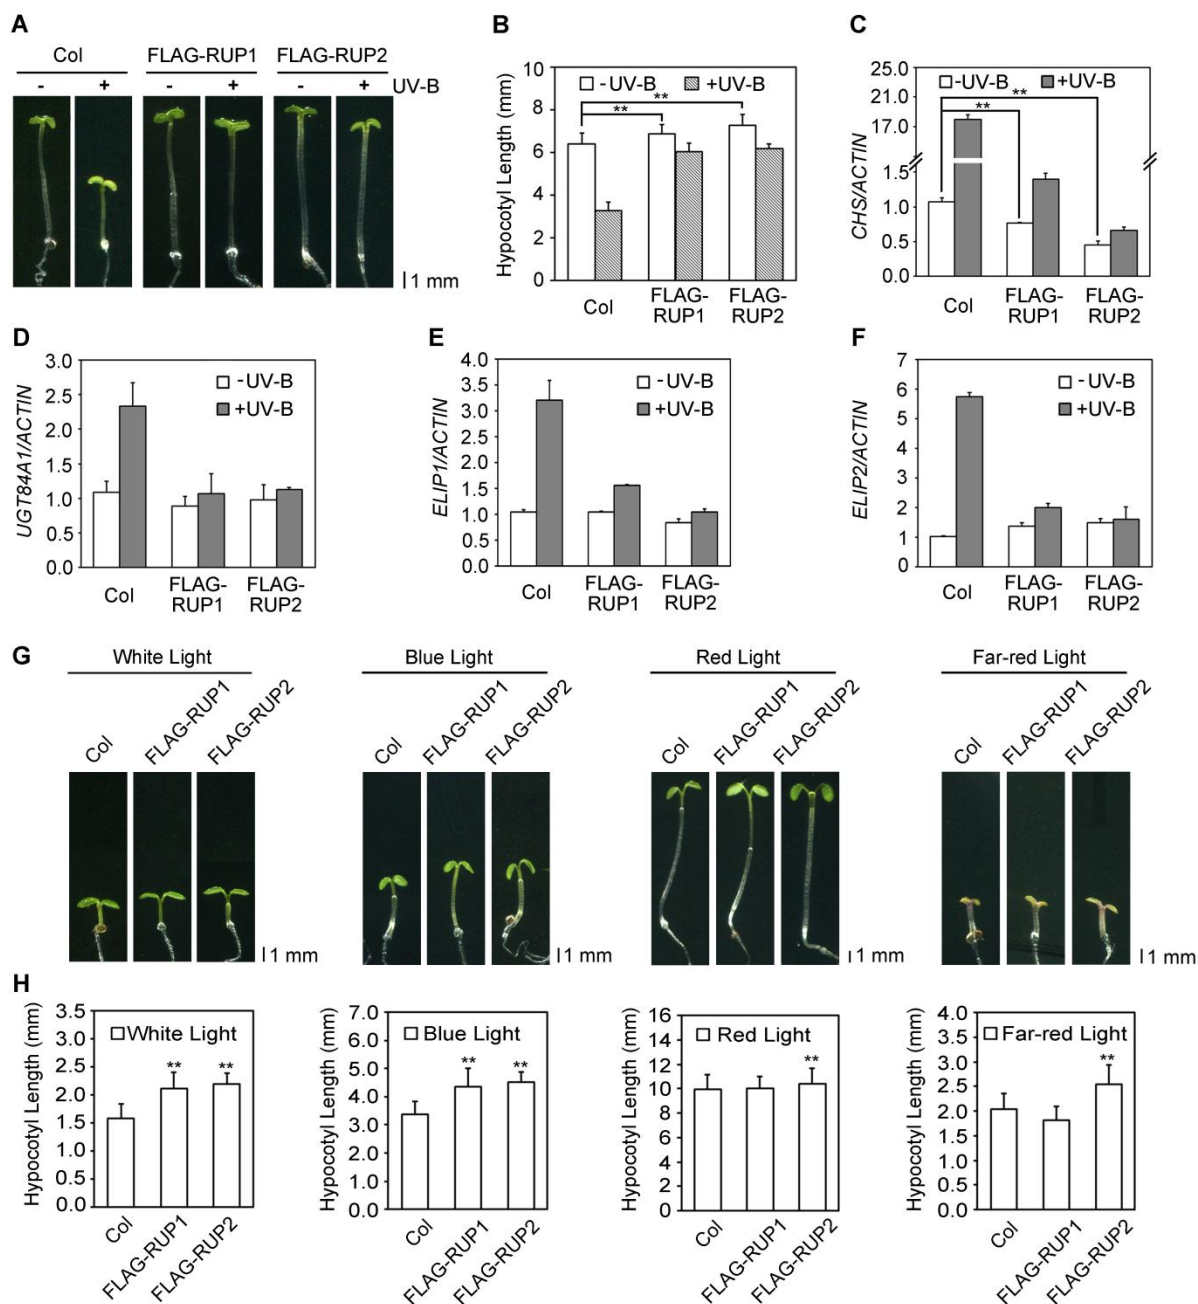

**Fig. S3. FLAG-RUP1 and FLAG-RUP2 Exhibit Hyposensitivity to Photomorphogenic UV-**

**B.**

(A) Phenotypes of 4-day-old Col, FLAG-RUP1, and FLAG-RUP2 seedlings grown under -UV-B and +UV-B.

(B) Hypocotyl length of the seedlings shown in (A). Mean  $\pm$  SD,  $n \geq 30$ . The asterisks indicate significant differences by Student's t test (\*\* $p < 0.01$ ).

(C-F) *CHS* (C), *UGT84A1* (D), *ELIP1* (E), and *ELIP2* (F) mRNA levels in the seedlings shown in (A). Mean  $\pm$  SD,  $n = 3$ . The asterisks indicate significant differences by Student's t test (\*\* $p < 0.01$ ).

(G) Phenotypes of 4-day-old Col, FLAG-RUP1 and FLAG-RUP2 seedlings grown under white light, blue light, red light and far-red light conditions.

(H) Hypocotyl length of the seedlings shown in (G). Mean  $\pm$  SD,  $n \geq 30$ . The asterisks indicate significant differences by Student's t test (\*\* $p < 0.01$ ) compared to Col under each light condition.

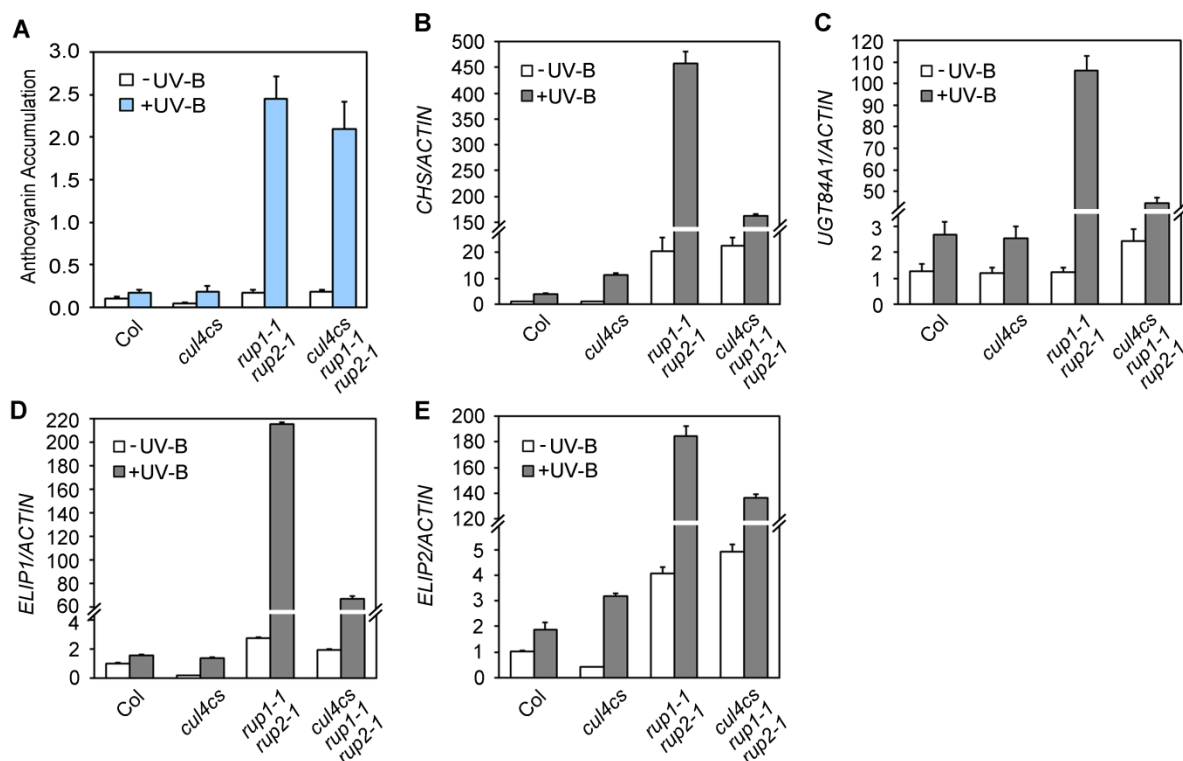

**Fig. S4. CUL4 and RUP1/RUP2 Genetically Interact to Influence UV-B-induced Anthocyanin Accumulation and Gene Expression.**

(A) Anthocyanin content of 4-day-old Col, *cul4cs*, *rup1-1 rup2-1*, and *cul4cs rup1-1 rup2-1* seedlings grown under –UV-B and +UV-B. Mean  $\pm$  SD, n=3.

(B-E) *CHS* (B), *UGT84A1* (C), *ELIP1* (D), and *ELIP2* (E) mRNA levels in the seedlings shown in (A). Mean  $\pm$  SD, n=3.

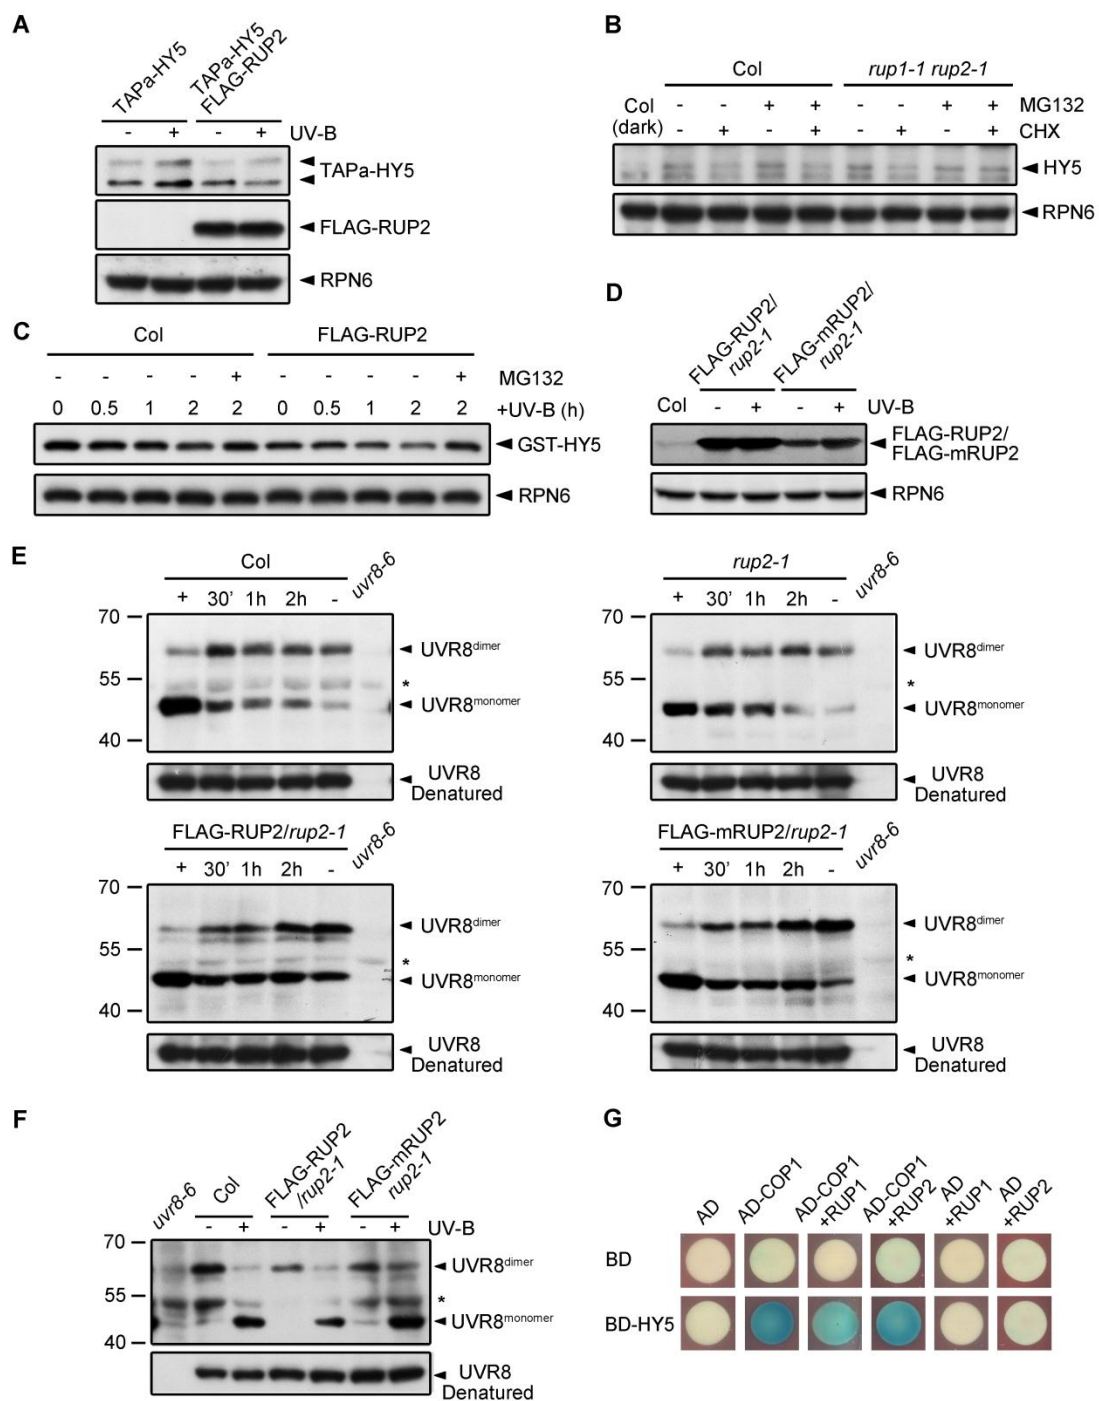

**Fig. S5. The Effects of RUP1/RUP2 on HY5 Stability, UVR8 Conformation and the COP1-HY5 Interaction.**

- (A) TAPa-HY5 protein levels in 4-day-old TAPa-HY5 and TAPa-HY5 FLAG-RUP2 seedlings grown under –UV-B and +UV-B. Proteins were analyzed by immunoblotting with anti-c-Myc, anti-FLAG, and anti-RPN6 antibodies. RPN6 was used as a loading control.
- (B) Immunoblot analysis of HY5 proteins in 4-day-old Col and *rup1-1 rup2-1* seedlings grown under –UV-B and treated with 500  $\mu$ M CHX and/or 50  $\mu$ M MG132 for 3 hours. HY5 was detected with anti-HY5 antibodies. RPN6 was used as a loading and negative control.
- (C) The effect of FLAG-RUP2 on HY5 stability in vitro, as analyzed by cell-free degradation assays. Purified GST-HY5 was incubated with total proteins extracted from 4-day-old UV-B-grown Col and FLAG-RUP2 seedlings for 2 hours. The degradation mixture was treated with or without 50  $\mu$ M MG132. GST-HY5 was detected with anti-GST antibody. RPN6 was used as a loading and negative control.
- (D) FLAG-RUP2/FLAG-mRUP2 protein levels in 4-day-old FLAG-RUP2/*rup2-1* and FLAG-mRUP2/*rup2-1* seedlings grown under –UV-B and +UV-B. Proteins were analyzed by immunoblotting with anti-FLAG and anti-RPN6 antibodies. RPN6 was used as a loading control.
- (E) Immunoblot analysis of UVR8 conformation in 4-day-old Col, *rup2-1*, FLAG-RUP2/*rup2-1* and FLAG-mRUP2/*rup2-1* seedlings grown under +UV-B and then transferred to –UV-B for 2 hours or grown under continuous –UV-B. Denatured UVR8 was used as a loading control. UVR8 was detected with anti-UVR8 antibodies. The asterisks indicate nonspecific bands.
- (F) Immunoblot analysis of UVR8 conformation in 4-day-old Col, FLAG-RUP2/*rup2-1* and FLAG-mRUP2/*rup2-1* seedlings grown under continuous –UV-B and +UV-B. Denatured UVR8 was used as a loading control. UVR8 was detected with anti-UVR8 antibodies. The asterisks indicate nonspecific bands.

(G) The effect of RUP1/RUP2 on the COP1-HY5 interaction in yeast. Co-transformed yeast cells were selected and then transferred to induction medium supplemented with X- $\beta$ -gal for blue color development.

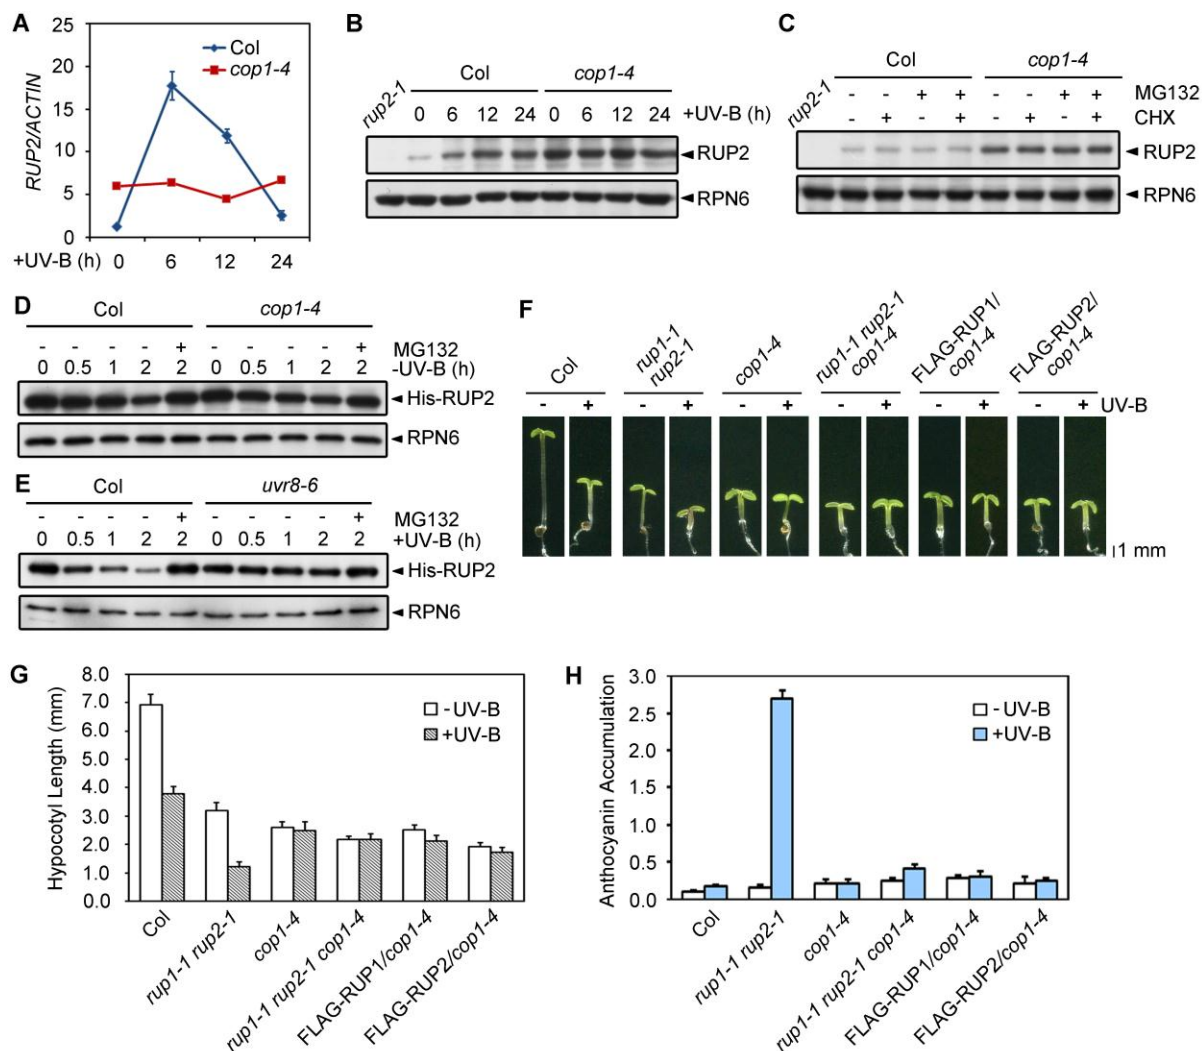

**Fig. S6. The Effects of COP1 on the Expression, Stability, and Function of RUP1/RUP2.**

(A) The effect of *cop1-4* mutation on the UV-B-induced expression of *RUP2* in *Arabidopsis*. Four-day-old -UV-B-grown Col and *cop1-4* seedlings were transferred to +UV-B for the indicated time periods. Mean  $\pm$ SD, n=3.

(B) RUP2 protein levels in 4-day-old Col and *cop1-4* seedlings grown under -UV-B and transferred to +UV-B for the indicated time periods. Proteins were analyzed by immunoblotting with anti-RUP2 and anti-RPN6 antibodies. RPN6 was used as a loading control.

(C) Immunoblot analysis of RUP2 proteins in 4-day-old Col and *cop1-4* seedlings grown under –UV-B and treated with 500  $\mu$ M CHX and/or 50  $\mu$ M MG132 for 3 hours. RUP2 was detected with anti-RUP2 antibodies. RPN6 was used as a loading and negative control.

(D) The effect of COP1 on RUP2 stability in vitro under –UV-B, as analyzed by cell-free degradation assays. Purified His-RUP2 was incubated with total proteins extracted from 4-day-old Col and *cop1-4* seedlings grown under –UV-B for 2 hours. The degradation mixture was treated with or without 50  $\mu$ M MG132. His-RUP2 was detected with anti-RUP2 antibodies. RPN6 was used as a loading and negative control.

(E) The effect of UVR8 on RUP2 stability in vitro under +UV-B, as analyzed by cell-free degradation assays. Purified His-RUP2 was incubated with total proteins extracted from 4-day-old Col and *uvr8-6* seedlings grown under +UV-B for 2 hours. The degradation mixture was treated with or without 50  $\mu$ M MG132. His-RUP2 was detected with anti-RUP2 antibodies. RPN6 was used as a loading and negative control.

(F) Phenotypes of 4-day-old Col, *rup1-1 rup2-1*, *cop1-4*, *rup1-1 rup2-1 cop1-4*, FLAG-RUP1/*cop1-4*, and FLAG-RUP2/*cop1-4* seedlings grown under –UV-B and +UV-B.

(G) Hypocotyl length of the seedlings shown in (E). Mean  $\pm$  SD,  $n \geq 30$ .

(H) Anthocyanin content of the seedlings shown in (E). Mean  $\pm$  SD,  $n=3$ .

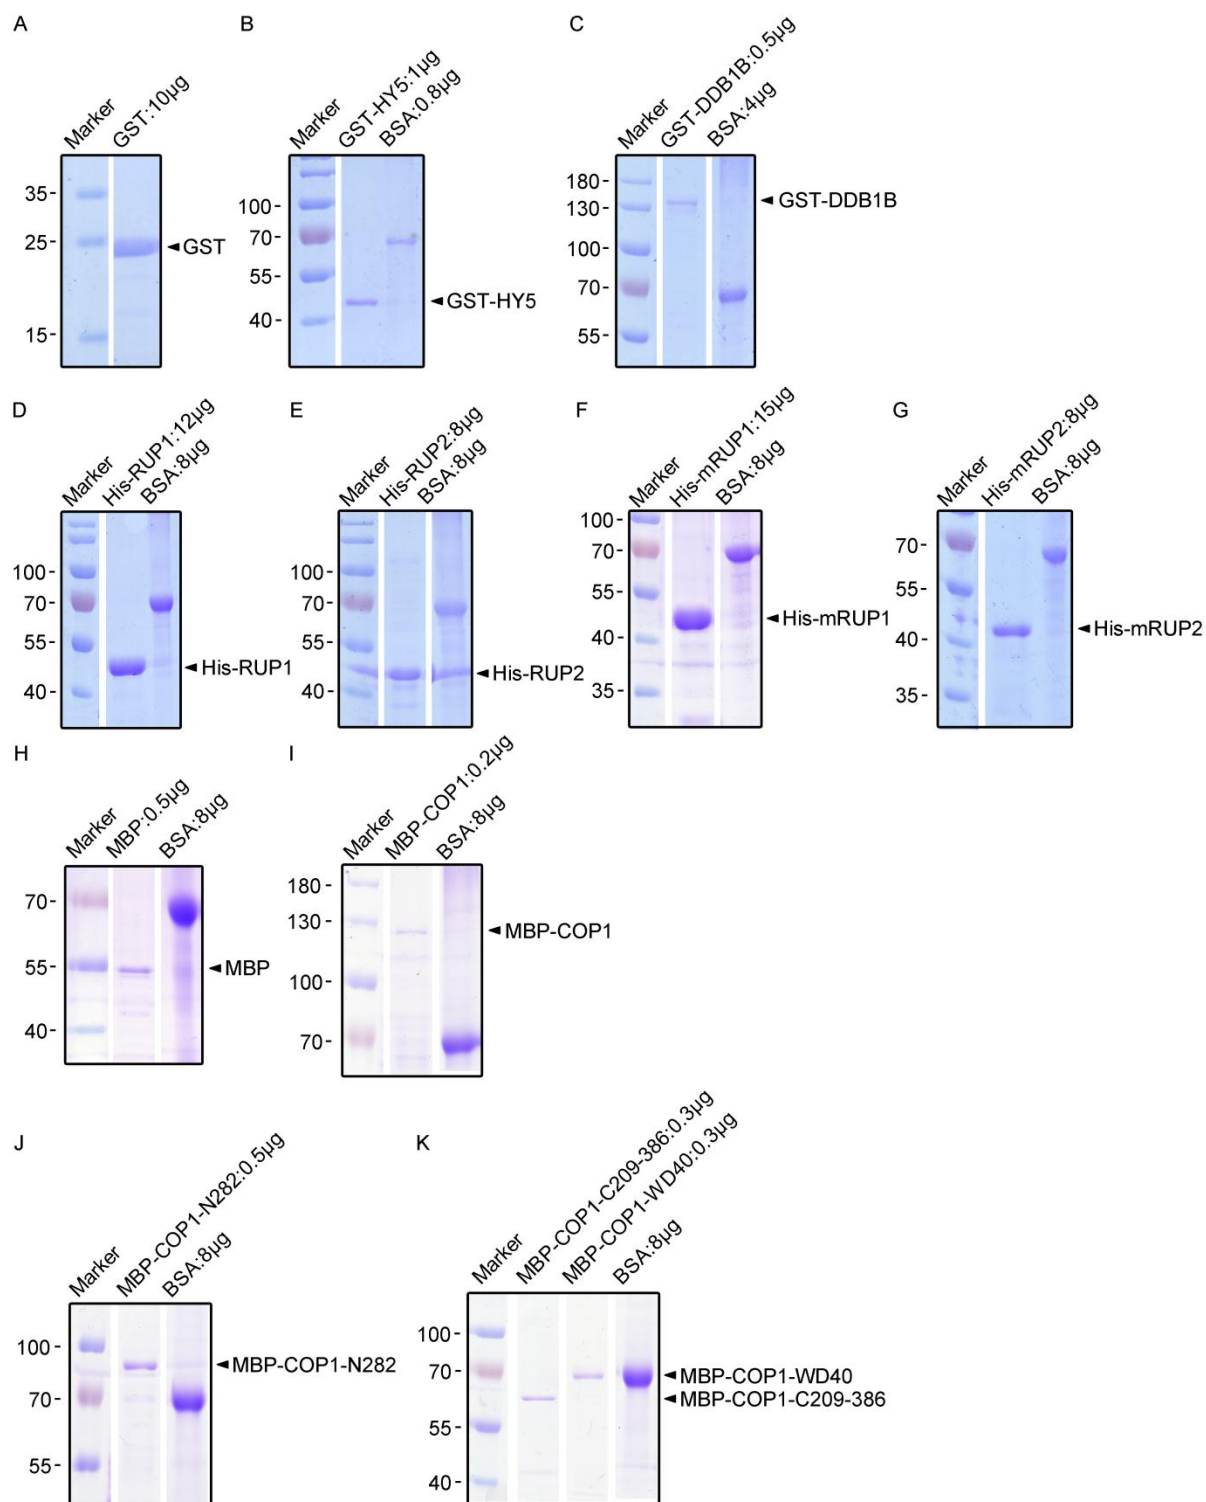

**Fig. S7. The Recombinant Proteins Used in This Study.**

**Table S1. Primers Used in This Study.**

| <b>Gene name</b>                                         | <b>Primers</b>                     |
|----------------------------------------------------------|------------------------------------|
| <b>Primers used for plant transformation</b>             |                                    |
| <i>RUP1-F</i>                                            | ATAC ggtacc ATGGAGGCTT TGTTCTGCTC  |
| <i>RUP1-R</i>                                            | ATAC ctcgag TTAGCTTTGT TTGCCCCGAGA |
| <i>RUP2-F</i>                                            | ATAC gtcgac ATGAACACTC TTCATCCTCA  |
| <i>RUP2-R</i>                                            | ATAC gagctc CTATGGTTTT CTTTGGCCCA  |
| <i>FLAG-mRUP2-F</i>                                      | ATAC ctcgag CAGGATCCCCCGGGCTGCAG   |
| <i>FLAG-mRUP2-R</i>                                      | ATAC actagt CTATGGTTTTCTTTGCCCA    |
| <b>Primers used for yeast two-hybrid assays</b>          |                                    |
| <i>AD/BD-RUP1-F</i>                                      | ATAC caattg ATGGAGGCTT TGTTCTGCTC  |
| <i>AD/BD-RUP1-R</i>                                      | ATAC ctcgag TTAGCTTTGT TTGCCCCGAGA |
| <i>AD-RUP2-F</i>                                         | ATAC caattg ATGAACACTC TTCATCCTCA  |
| <i>AD-RUP2-R</i>                                         | ATAC ctcgag CTATGGTTTT CTTTGGCCCA  |
| <b>Primers used for <i>in vitro</i> pull-down assays</b> |                                    |
| <i>His-RUP1-F</i>                                        | ATAC caattg ATGGAGGCTT TGTTCTGCTC  |
| <i>His-RUP1-R</i>                                        | ATAC ctcgag TTAGCTTTGT TTGCCCCGAGA |
| <i>His-RUP2-F</i>                                        | ATAC caattg ATGAACACTC TTCATCCTCA  |
| <i>His-RUP2-R</i>                                        | ATAC ctcgag CTATGGTTTT CTTTGGCCCA  |
| <i>MBP-COP1-F</i>                                        | ATAC gtcgac ATGGAAGAGATTTTCGACGGA  |
| <i>MBP-COP1-R</i>                                        | ATAC ctgcag TCACGCAGCGAGTACCAGAA   |
| <i>MBP-COP1-</i>                                         | ATAC gaattc ATGGAAGAGATTTTCGACGGA  |

*N282-F*

*MBP-COPI-*

ATAC ctgcag ctgcag TCACGAATCTGACCCACTCAGCG

*N282-R*

*MBP-COPI-*

ATAC gaattc ATGGCTAGGGACAGATATTCTGTAAAGTT

*C209-386-F*

*MBP-COPI-*

ATAC ctgcag ctgcag TCAAAACAGCTCATCATCACGATCA

*C209-386-R*

*MBP-COPI-*

ATAC gaattc ATGGCCACTGCTGGTGTTCCTAGAT

*WD40-F*

*MBP-COPI-*

ATAC ctgcag TCACGCAGCGAGTACCAGAA

*WD40-R*

---

**Primers used for site-directed mutagenesis**

---

*mRUP1 D196A*

GAACGGTTCAAATGTGGGCTCCAGCTAACGGAGGGACGTTAG

*R198A-F*

*mRUP1 D196A*

CTAACGTCCCTCCGTTAGCTGGAGCCCACATTTGAACCGTTC

*R198A-R*

*mRUP1 D241A*

CCGGAATGCCTACGTGTATGCCATCGCAAGACTAGTGGACCC

*R243A-F*

*mRUP1 D241A*

GGGTCCACTAGTCTTGCGATGGCATAACGTAGGCATTCCGG

*R243A-R*

*mRUP1 D328A*

CAAGTGTTTGTGTACGCTAAGGCGTGGGAGGAACCGGTTTGG

*R330A-F*

*mRUP1 D328A*

CCAAACCGGTTCCCTCCCACGCCTTAGCGTACACAAACACTTG

*R330A-R*

*mRUP2 D175A*  
GACTATGCAAGTATGGGCTCCGGCGTGTCCGCCGGAAGAATC  
*R177A-F*

*mRUP2 D175A*  
GATTCTTCCGGCGGACACGCCGGAGCCCATACTTGCATAGTC  
*R177A-R*

*mRUP2 D223A*  
CGGAAAGGGTACGTTTACGCTATAGCGAAACTCGTTGACCCG  
*R225A-F*

*mRUP2 D223A*  
CGGGTCAACGAGTTTCGCTATAGCGTAAACGTACCCTTTCCG  
*R225A-R*

*mRUP2 D309A*  
AGGGTGTTTGTGTACGCTAGGGCATGGGGGAAGCCGGTTTGG  
*R311A-F*

*mRUP2 D309A*  
CCAAACCGGCTTCCCCCATGCCCTAGCGTACACAAACACCCT  
*R311A-R*

---

**Primers used for firefly luciferase complementation imaging**

---

|                    |                                    |
|--------------------|------------------------------------|
| <i>RUP1-nLUC-F</i> | ATAC ggtacc ATGGAGGCTTTGTTCTGCTC   |
| <i>RUP1-nLUC-R</i> | ATAC gtcgac GCTTTGT TTGCCCCGAGA    |
| <i>RUP2-nLUC-F</i> | AGAC agatct ATGAACACTCTTCATCCTC    |
| <i>RUP2-nLUC-R</i> | ATAC gtcgac TGGTTTTCTTTTGCCC       |
| <i>cLUC-RUP1-F</i> | ATAC ggtacc ATGGAGGCTTTGTTCTGCTC   |
| <i>cLUC-RUP1-R</i> | ATAC gtcgac TTAGCTTTGT TTGCCCCGAGA |
| <i>cLUC-RUP2-F</i> | AGAC agatct GATGAACACTCTTCATCCTC   |
| <i>cLUC-RUP2-R</i> | ATAC gtcgac CTATGGTTTTCTTTTGCCC    |
| <i>cLUC-COP1-F</i> | ATAC ggtacc ATGGAAGAGA TTTCGACGGA  |

|                                            |                                             |
|--------------------------------------------|---------------------------------------------|
| <i>cLUC-COP1-R</i>                         | ATAC gtcgac TCACGCAGCGAGTACCAGAA            |
| <i>cLUC-COP1-N282-F</i>                    | CGGTACCCGGGATCCAATGGAAGAGATTTTCGACGGA       |
| <i>cLUC-COP1-N282-R</i>                    | GCTCTGCAGGTCGACTCACGAATCTGACCCACTCAGCG      |
| <i>cLUC-COP1-C209-386-F</i>                | CGGTACCCGGGATCCAATGGCTAGGGACAGATATTCTGTAAAG |
| <i>cLUC-COP1-C209-386-R</i>                | GCTCTGCAGGTCGACTCAAAACAGCTCATCATCACGATCA    |
| <i>cLUC-COP1-WD40-F</i>                    | CGGTACCCGGGATCCAATGGCCACTGCTGGTGTTTCTAGAT   |
| <i>cLUC-COP1-WD40-R</i>                    | GCTCTGCAGGTCGACTCACGCAGCGAGTACCAGAACT       |
| <i>cLUC-COP1<math>\Delta</math>RING-F1</i> | CGGTACCCGGGATCCAATGGAAGAGATTTTCGACGGA       |
| <i>cLUC-COP1<math>\Delta</math>RING-R1</i> | ACCGCCGCTTCCTCCGTCGTCA                      |
| <i>cLUC-COP1<math>\Delta</math>RING-F2</i> | GGAGGAAGCGGCGGTCTCGATAAGCTATTGAAGAAAACCTT   |
| <i>cLUC-COP1<math>\Delta</math>RING-R2</i> | GCTCTGCAGGTCGACTCACGCAGCGAGTACCAGAACT       |
| <i>cLUC-COP1<math>\Delta</math>Coil-F1</i> | CGGTACCCGGGATCCAATGGAAGAGATTTTCGACGGA       |

|                                                        |                                        |
|--------------------------------------------------------|----------------------------------------|
| <i>cLUC-</i>                                           | CCGAAACTGATCCAAGGGCGAT                 |
| <i>COP1<math>\Delta</math>Coil-R1</i>                  |                                        |
| <i>cLUC-</i>                                           | TTGGATCAGTTTCGGAAGTTGCGGATGCTCGGAGATGA |
| <i>COP1<math>\Delta</math>Coil-F2</i>                  |                                        |
| <i>cLUC-</i>                                           | GCTCTGCAGGTCGACTCACGCAGCGAGTACCAGAACT  |
| <i>COP1<math>\Delta</math>Coil-R2</i>                  |                                        |
| <i>cLUC-</i>                                           | CGGTACCCGGGATCCAATGGAAGAGATTTCGACGGA   |
| <i>COP1<math>\Delta</math>R<math>\Delta</math>C-F1</i> |                                        |
| <i>cLUC-</i>                                           | CCGAAACTGATCCAAGGGCGAT                 |
| <i>COP1<math>\Delta</math>R<math>\Delta</math>C-R1</i> |                                        |
| <i>cLUC-</i>                                           | TTGGATCAGTTTCGGAAGTTGCGGATGCTCGGAGATGA |
| <i>COP1<math>\Delta</math>R<math>\Delta</math>C-F2</i> |                                        |
| <i>cLUC-</i>                                           | GCTCTGCAGGTCGACTCACGCAGCGAGTACCAGAACT  |
| <i>COP1<math>\Delta</math>R<math>\Delta</math>C-R2</i> |                                        |

---

**Primers used for ubiquitination assays in HEK293T cells**

---

|                    |                                   |
|--------------------|-----------------------------------|
| <i>FLAG-COP1-F</i> | AGAGAATTC ggtacc ATGGAAGAGATTTCG  |
| <i>FLAG-COP1-R</i> | CTTCCATGG ctcgag TCACGCAGCGAGTAC  |
| <i>RUP2-HA-F</i>   | AGAGAATTC ggatcc ATGAACACTC TTCAT |
| <i>RUP2-HA-R</i>   | CTTCCATGG ctcgag TGGTTTTCTTTTGCC  |

---

**Primers used for yeast three-hybrid assays**

---

|                     |                                        |
|---------------------|----------------------------------------|
| <i>RUP1 (Y3H)-F</i> | ATAC ggtacc ATGGAGGCTTTGTTCTGCTCT      |
| <i>RUP1 (Y3H)-R</i> | ATAC gaattc TTAGCTTTGTTTGCCCGAGA       |
| <i>RUP2 (Y3H)-F</i> | GTCGAATTGGGTACCATGAACACTCTTCATCCTCACAA |

*RUP2 (Y3H)-R*                    ACCCGGGTGGAATTCCTATGGTTTTCTTTGCCCAC

---

**Primers used for qRT-PCR**

---

|                  |                          |
|------------------|--------------------------|
| <i>Actin-F</i>   | CAAGGCCGAGTATGATGAGG     |
| <i>Actin-R</i>   | GAAACGCAGACGTAAGTAAAAAC  |
| <i>RUP2-F</i>    | TCGGATGACGGGACT          |
| <i>RUP2-R</i>    | GACGCAACAAACAGCA         |
| <i>CHS-F</i>     | ACGTCACGTGTTGAGCGAGTATGG |
| <i>CHS-R</i>     | GAGGAACGCTGTGCAAGACGACTG |
| <i>UGT84A1-F</i> | AGTCGGGTTTATCGTTCT       |
| <i>UGT84A1-R</i> | ATCCCTTTACCTTTAGCAC      |
| <i>ELIP1-F</i>   | CGTTGCCGAAGTCACCAT       |
| <i>ELIP1-R</i>   | AATCCAACCATCGCTAAACG     |
| <i>ELIP2-F</i>   | CACCACAAATGCCACAGTCT     |
| <i>ELIP2-R</i>   | TGCTAGTCTCCCGTTGATCC     |

---
